# Supplementary material for: Expression and Functional Analyses of Nymphaea caerulea MADS-Box Genes Contribute to Clarify the Complex Flower Patterning of Water Lilies
Source: PubMed Central journal article supplement (PMC8492926; doi:10.3389/fpls.2021.730270), 2021-09-22
Supplement: Data_Sheet_8.pdf [file Data_Sheet_8.pdf]

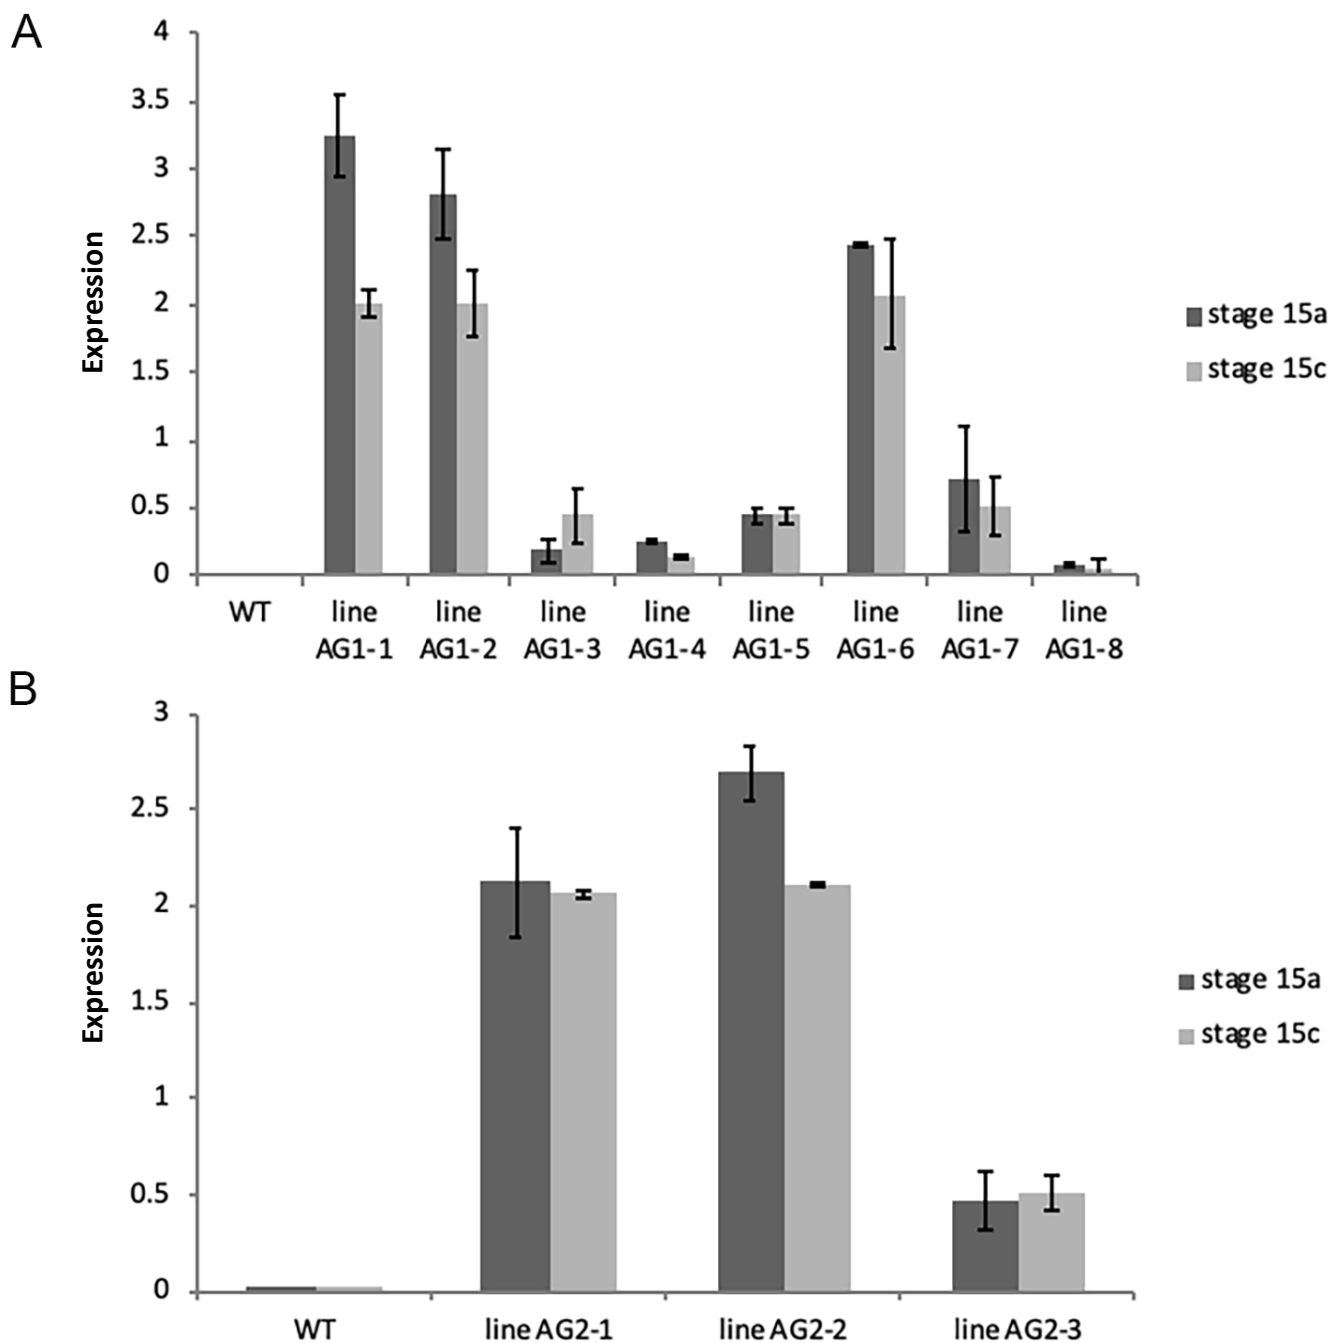

**Supplementary Figure 8.** Expression levels of *NycAG1* and *NycAG2* in *shp1 shp2 Arabidopsis* lines. **(A)** Expression of *pSHP2:NycAG1* and **(B)** expression of *pSHP2:NycAG2* in two developmental stages of the fruit (stage 15a and stage 15c). Values in the graphs represent initial RNA quantities  $\pm$  standard deviation.
