# Supplementary material for: Expression and Functional Analyses of Nymphaea caerulea MADS-Box Genes Contribute to Clarify the Complex Flower Patterning of Water Lilies
Source: PubMed Central journal article supplement (PMC8492926; doi:10.3389/fpls.2021.730270), 2021-09-22
Supplement: Table_1.pdf [file Table_1.pdf]

**Supplementary Table 1.** Transcripts isolated and studied in this work. For each transcript, length (bp) and NCBI accession number are provided.

| Transcript Name | NCBI Accession Number | Length (bp) |
|-----------------|-----------------------|-------------|
| <i>NycFL</i>    | MN626366              | 924         |
| <i>NycAP3-1</i> | MN626367              | 800         |
| <i>NycAP3-2</i> | MN626368              | 929         |
| <i>NycAP3-3</i> | MN626386              | 1245        |
| <i>NycPI</i>    | MN626369              | 972         |
| <i>NycAG1</i>   | MN626373              | 1238        |
| <i>NycAG2</i>   | MN626374              | 1162        |
| <i>NycSTK</i>   | MN626375              | 787         |
| <i>NycAGL6</i>  | MN626370              | 1447        |
| <i>NycSEP</i>   | MN626371              | 1223        |
| <i>NycACT</i>   | MN626379              | 901         |
