# Supplementary material for: Expression and Functional Analyses of Nymphaea caerulea MADS-Box Genes Contribute to Clarify the Complex Flower Patterning of Water Lilies
Source: PubMed Central journal article supplement (PMC8492926; doi:10.3389/fpls.2021.730270), 2021-09-22
Supplement: Table_2.pdf [file Table_2.pdf]

**Supplemental Table 2.** List of oligonucleotides used in this work.

All the oligonucleotides have been designed in this work except where differently indicated.

| Primer name              | 5'-3' sequence                          | Gene name | Reference               |
|--------------------------|-----------------------------------------|-----------|-------------------------|
| <b>RT-PCR</b>            |                                         |           |                         |
| <b>Oligo-dT primers</b>  |                                         |           |                         |
| Right_PolyT_ORTOLAB      | CCGGATCTCTAGACGGCCGCTTTTTTTTTTTTTTTTTVN |           |                         |
| <b>RT-PCR Fw primers</b> |                                         |           |                         |
| MADS_deg_K98             | GGGGTACCAAYMGICARGTIACITAYTCIAAGMGIMG   |           | Kramer et al.<br>1998   |
| MADS_deg_K04             | GGIMGIGGIAARATIGARATIAARMGIAT           |           | Kramer et al.<br>2004   |
| MADS_deg2_S04            | ATGGSIMGIGGIAARATISARAT                 |           | Stellari et al.<br>2004 |
| 1left_ORTOLAB            | AAGAAGGCVWASGAGYTSWCYG                  |           |                         |
| 2left_ORTOLAB            | AAGAAGGCVWASGAGYTSWCYGT                 |           |                         |
| 3left_ORTOLAB            | AAGAAGGCVWASGAGYTSWCYGTS                |           |                         |
| 1left_ORTOLAB            | AYAAACTMMRGVAGMAGAWC                    |           |                         |
| 2left_ORTOLAB            | AYAAACTMMRGVAGMAGAWCR                   |           |                         |

---

**RT-PCR Rev primer**

---

|                   |                        |
|-------------------|------------------------|
| Right_PCR_ORTOLAB | CCGGATCTCTAGACGGCCGCTT |
|-------------------|------------------------|

---

---

**qPCR primers**

---

|               |                      |
|---------------|----------------------|
| Nc_AP1_c1_for | CAGAGGGGGACACTGTGGTA |
|---------------|----------------------|

*NycFL*

|               |                       |
|---------------|-----------------------|
| Nc_AP1_c1_rev | GCTGTGTCTTCCTCAGTCGAA |
|---------------|-----------------------|

---

---

|                 |                        |
|-----------------|------------------------|
| Nc_AP3-I_c2_for | AGGTTAGCTGATGACCCTAGAA |
|-----------------|------------------------|

*NycAP3-1*

|                 |                      |
|-----------------|----------------------|
| Nc_AP3-I_c2_rev | CACACACTGTGCCAGTGAAA |
|-----------------|----------------------|

---

---

|                  |                       |
|------------------|-----------------------|
| Nc_AP3-II_c1_for | TGGGCTGTGCAAATCCAACAT |
|------------------|-----------------------|

*NycAP3-2*

|                  |                          |
|------------------|--------------------------|
| Nc_AP3-II_c1_rev | CTTCTTGTAACCTCCCTGAAACCT |
|------------------|--------------------------|

---

---

|                |                        |
|----------------|------------------------|
| Nc_AP3-III_for | GATTCTTGATGCAGATAAGGAG |
|----------------|------------------------|

*NycAP3-2*

|                   |                      |
|-------------------|----------------------|
| Nc_AP3-III_c2_rev | CACACACTGTGCCAGTGAAA |
|-------------------|----------------------|

---

---

|              |                      |
|--------------|----------------------|
| Nc_PI_c1_for | AGAGAATGCCTCCAACAGGC |
|--------------|----------------------|

*NycPI*

|              |                      |
|--------------|----------------------|
| Nc_PI_c1_rev | CATTCGGTCTGCTTCATGCG |
|--------------|----------------------|

---

---

|               |                      |
|---------------|----------------------|
| Nc_AG1_c6_for | AGAACGAAAGAGCGGAGCAG |
|---------------|----------------------|

*NycAG1*

|               |                      |
|---------------|----------------------|
| Nc_AG1_c6_rev | TTGGTGCGAGTATTGGTGGT |
|---------------|----------------------|

---

---

|               |                      |
|---------------|----------------------|
| Nc_AG2_c1_for | AGAACACGACTAACCGGCAG |
|---------------|----------------------|

*NycAG2*

|               |                      |
|---------------|----------------------|
| Nc_AG2_c1_rev | CCCAAGTCGCTCATCCAAGT |
|---------------|----------------------|

---

|                 |                         |                |
|-----------------|-------------------------|----------------|
| Nc_AG3_5'       | CAAGAAGGCGTGCGCTGAAA    | <i>NycSTK</i>  |
| Nc_AG3_3'       | CTGGTTATGCCCCGCTCTATTTT |                |
| Nc_AGL6_c10_for | AGACTTTGCTGATGGGGCAA    | <i>NycAGL6</i> |
| Nc_AGL6_c10_rev | GGCAGACACGGCCAGTAAT     |                |
| Nc_SEP1_c2_for  | TTCTGTACTCTGCGATGCCG    | <i>NycSEP</i>  |
| Nc_SEP1_c2_rev  | AGGACCCAGATCTTCACCGA    |                |

---

**Cloning of *N. caerulea*  
genes for *A. thaliana*  
complementation**

|             |                                                        |               |
|-------------|--------------------------------------------------------|---------------|
| ninph001_GW | GGGGACAAGTTTGTACAAAAAAGCAGGCTTCATGGGGAGGGGAAAGATCG     | <i>NycAG1</i> |
| ninph002_GW | GGGGACCACTTTGTACAAGAAAGCTGGGTCTCATCCAAGTTGCAAGGCAG     |               |
| ninph003_GW | GGGGACAAGTTTGTACAAAAAAGCAGGCTTCGGGAATTTGGAGAAGATGGGAAG | <i>NycAG2</i> |
| ninph004_GW | GGGGACCACTTTGTACAAGAAAGCTGGGTCTCTTGGATCCTTCCCAAGTCG    |               |

---

**Genotyping of *A.*  
*thaliana* transgenic lines**

|          |                        |               |
|----------|------------------------|---------------|
| ninph007 | GCTGAAACGAATGCGCAGTA   | <i>NycAG1</i> |
| ninph008 | TACTGCGCATTTCGTTTCAGC  |               |
| ninph009 | AGTGAAATGAGTCACCGAGACC | <i>NycAG2</i> |
| ninph010 | GGTCTCGGTGACTCATTTCACT |               |

---

|                  |                                |                |
|------------------|--------------------------------|----------------|
| AtP_1805_FW      | CTTCACATCATGTGTCACATTAAGTTGC   | <i>promAG</i>  |
| AtP_4304_FW      | AGAATAGTATCTTTAGGCCAATGAACAAAT | <i>promSHP</i> |
| AtP_1665_REV_int | GAACTACTCACACATTATTCTGG        | <i>T35S</i>    |

---

**Transgene expression  
quantification**

|                  |                          |                           |
|------------------|--------------------------|---------------------------|
| nymAG1_for       | AGAACGAAAGAGCGGAGCAG     | <i>NycAG1</i>             |
| nymAG1_rev       | TTGGTGCGAGTATTGGTGGT     |                           |
| nymAG2_for       | AGAACACGACTAACCGGCAG     | <i>NycAG2</i>             |
| nymAG2_rev       | CCCAAGTCGCTCATCCAAGT     |                           |
| Actin RT 861_for | CTCAGGTATTGCAGACCGTATGAG | <i>Arabidopsis actin8</i> |
| Actin RT 862_rev | CTGGACCTGCTTCATCATACTCTG |                           |

---

**Cloning of *N. caerulea*  
genes for Y2H assay**

|                |                                                     |                |
|----------------|-----------------------------------------------------|----------------|
| attB1_for_SEP  | GGGGACAAGTTTGTACAAAAAAGCAGGCTCAGGATGGGAAGAGGCAGAGT  | <i>NycSEP</i>  |
| attB2_rev_SEP  | GGGGACCACTTTGTACAAGAAAGCTGGGTTCATACTAGCCACGGAGGGA   |                |
| attB1_for_AGL6 | GGGGACAAGTTTGTACAAAAAAGCAGGCTCGGGTTGTGCCTTGAGAGATCA | <i>NycAGL6</i> |
| attB2_rev_AGL6 | GGGGACCACTTTGTACAAGAAAGCTGGGTAAGGATTACAGGACCCAGCCT  |                |
| attB1_for_PI   | GGGGACAAGTTTGTACAAAAAAGCAGGCTCAGTGGTCGGTTGCTGGAGAT  | <i>NycPI</i>   |

|                   |                                                         |                   |
|-------------------|---------------------------------------------------------|-------------------|
| attB2_rev_PI      | GGGGACCACTTTGTACAAGAAAGCTGGGTAGTGCATCAAACCAATGCC        |                   |
| attB1_for_AP3     | GGGGACAAGTTTGTACAAAAAAGCAGGCTCATGGGTCGTGGTAAGATA        |                   |
| attB2_rev_AP3_1   | GGGGACCACTTTGTACAAGAAAGCTGGGTTCATCCTAGACTTAAATCATG      | <i>NycAP3-1</i>   |
| attB1_for_AP3     | GGGGACAAGTTTGTACAAAAAAGCAGGCTCATGGGTCGTGGTAAGATA        |                   |
| attB2_rev_AP3_2   | GGGGACAAGTTTGTACAAGAAAGCTGGGTTTAATCCATGCCACAAAATA       | <i>NycAP3-2/3</i> |
| attB1_for_AG3     | GGGGACAAGTTTGTACAAAAAAGCAGGCTCATGGGAAGGGGAAAGATTGAGATC  |                   |
| attB2_rev_AG3     | GGGGACCACTTTGTACAAGAAAGCTGGGTGGAGCATAACAATTCAGACAACAC   | <i>NycSTK</i>     |
| attB1_for_AG2     | GGGGACAAGTTTGTACAAAAAAGCAGGCTCGGGAATTTGGAGAAGATGGGAAGAG |                   |
| attB2_rev_AG2     | GGGGACCACTTTGTACAAGAAAGCTGGGTCTACATAAGATTGGGACCTTGATC   | <i>NycAG2</i>     |
| attB1_for_AG1     | GGGGACAAGTTTGTACAAAAAAGCAGGCTCAGCAAAGTGGGAAGATGGGGA     |                   |
| attB2_rev_AG1     | GGGGACCACTTTGTACAAGAAAGCTGGGTTGAGGCTTTGGGCTTTCAATG      | <i>NycAG1</i>     |
| attB1_for_AP1/FUL | GGGGACAAGTTTGTACAAAAAAGCAGGCTCCTCTGCGACGCCGAGGTTGC      |                   |
| attB2_rev_AP1/FUL | GGGGACCACTTTGTACAAGAAAGCTGGGTTCATATGAGCTGAAGGGTCCAGGG   | <i>NycFL</i>      |
